# Supplementary material
Source: PubMed Central journal article supplement (PMC5994174)
Supplement: NIHMS936684-supplement-supplement_1.pdf [file NIHMS936684-supplement-supplement_1.pdf]

**Table S1. Demographics Table (N-60)**

| <i>Characteristics</i>             |                                  | <i>Non-Atopic<br/>n=21</i> | <i>ADEH-<br/>n=19</i> | <i>ADEH+<br/>n=20</i> |
|------------------------------------|----------------------------------|----------------------------|-----------------------|-----------------------|
| <b>Age (years) Median (Q1, Q3)</b> |                                  | 33 (17,39)                 | 29 (14,43)            | 26 (19,39)            |
| <b>EASI Median (Q1, Q3)</b>        |                                  | N/A                        | 6 (2,17)              | 13 (6,25)             |
| <b>Gender N(%)</b>                 | <b>Female</b>                    | 12 (57%)                   | 11 (58%)              | 11 (55%)              |
|                                    | <b>Male</b>                      | 9 (43%)                    | 8 (42%)               | 9 (45%)               |
| <b>Race N(%)</b>                   | <b>Asian</b>                     | 1 (5%)                     | 1 (5%)                | 1 (5%)                |
|                                    | <b>Black or African American</b> | 1 (5%)                     | 5 (26%)               | 5 (25%)               |
|                                    | <b>Caucasian</b>                 | 18 (86%)                   | 11 (58%)              | 14 (70%)              |
|                                    | <b>Multi-racial</b>              | 0 (0%)                     | 2 (11%)               | 0 (0%)                |
|                                    | <b>Other</b>                     | 1 (5%)                     | 0 (0%)                | 0 (0%)                |
| <b>HSV-1 IgG positive N(%)</b>     |                                  | 9(43%)                     | 6(32%)                | 19(95%)               |
| <b>HSV-1/2 IgG positive N(%)</b>   |                                  | 1(5%)                      | 2(11%)                | 1(5%)                 |
| <b>HSV-2 IgG positive N(%)</b>     |                                  | 2(10%)                     | 0(0%)                 | 0(0%)                 |

\*Median (with interquartile range)
